# Supplementary material for: Hollow silver alginate microspheres for drug delivery and surface enhanced Raman scattering detection
Source: Royal Society of Chemistry journal article supplement (doi:10.1039/c6ra02019d), 2016-01-01
Supplement: c6ra02019d1.pdf [file c6ra02019d1.pdf]

## Supporting Information

### Hollow Silver Alginate Microspheres for Drug Delivery and Surface Enhanced Raman Scattering Detection

Ekaterina Lengert, Alexey M. Yashchenok, Vsevolod Atkin, Ales Lapanje, Dmitry A. Gorin, Gleb B. Sukhorukov, and Bogdan V. Parakhonskiy\*

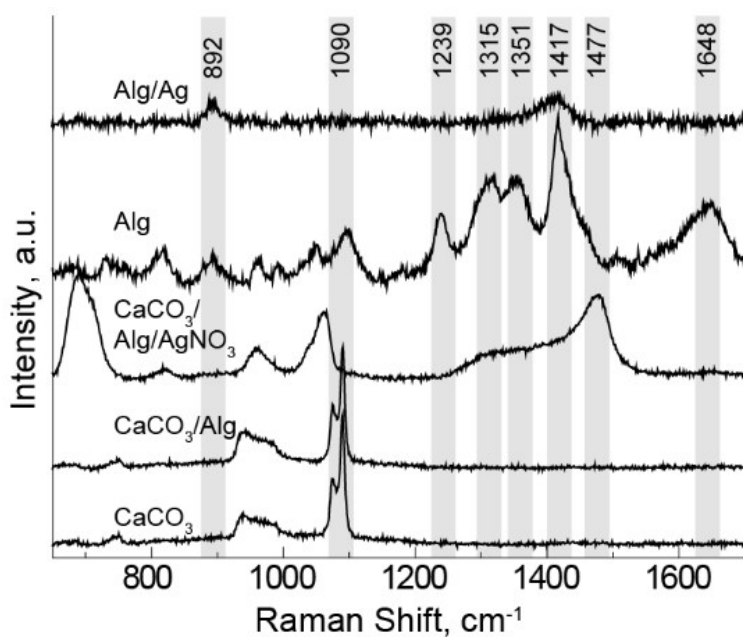

Figure S1. Controlled SERS spectra acquired from the blank calcium carbonate microspheres ( $\text{CaCO}_3$ ), calcium carbonate microsphere with alginate layer ( $\text{CaCO}_3/\text{Alg}$ ), calcium carbonate microspheres with silver alginate layer ( $\text{CaCO}_3/\text{Alg}/\text{Ag}$ ), alginate ( $\text{Alg}$ ) and silver alginate ( $\text{Alg}/\text{Ag}$ ) are shown for the reference. All spectra are shifted for the clarity. All SERS spectra were acquired with laser wavelength of 785 nm through 50x air objective at a power of 0.03 mW.
